# Supplementary material for: Optimization of Enzymatic Fragmentation is Crucial To Maximize Genome Coverage: A Comparison of Library Preparation Methods for Illumina Sequencing
Source: Research Square preprint supplement (doi:10.21203/rs.3.rs-965847/v1), 2021-10-21
Supplement: Supplementary file 1 [file 7cebf76a463043c67620cf4f.xlsx]

## Sheet: Sheet1
Kit	Input	Library Replicate	Region Molarity from Tapestation [nM]	Molarity from qPCR [nM]	Elution Volume [µl]
Nextera	10 ng	1	23.9	45.2662	30
		2	18.9	50.357
		3	18.7	45.774
		4	23.6	48.5104
Kapa		1	122	20.2611	55
		2	154	21.5472
		3	108	28.1307
		4	140	20.1977
Quanta		1	86.6	26.8774	30
		2	65	30.6258
		3	86.9	24.6739
		4	76.7	41.2221
Swift2S		1	5.67	18.3492	20
		2	8.41	20.8563
		3	8.97	19.3631
		4	10.4	20.4569
NEB		1	13.2	26.6898	30
		2	15.9	35.5254
		3	13.7	25.6925
		4	17.4	36.1182
Nextera	100 ng	1	24.1	45.4648	30
		2	22.3	55.7733
		3	26.2	60.9034
		4	24	48.4226
Kapa		1	NA	28.5755	55
		2	NA	38.032
		3	NA	38.8978
		4	NA	31.1976
Quanta		1	NA	26.8774	30
		2	NA	30.6258
		3	NA	24.6739
		4	NA	41.2221
Swift2S		1	NA	17.5537	20
		2	NA	20.0018
		3	NA	18.1974
		4	NA	16.297
NEB		1	22.2	24.3474	30
		2	22.6	27.0795
		3	23	31.3695
		4	22.3	31.2524
